# Supplementary material
Source: PubMed Central journal article supplement (PMC3262851)
Supplement: supp_kfr251_KFR251_toxsci_11_0379_File002.pdf [file supp_kfr251_KFR251_toxsci_11_0379_File002.pdf]

## Supplementary Figure 1

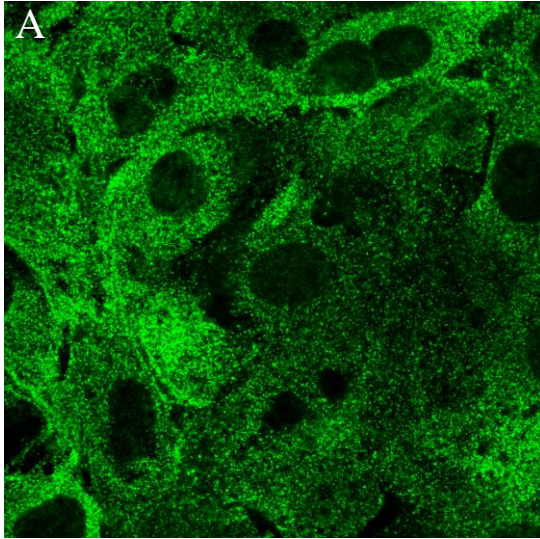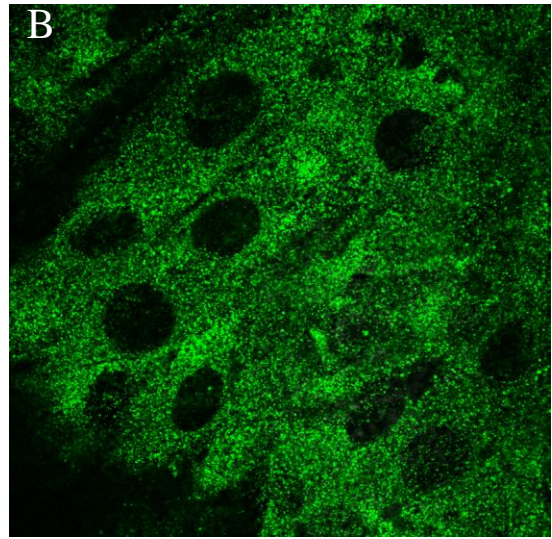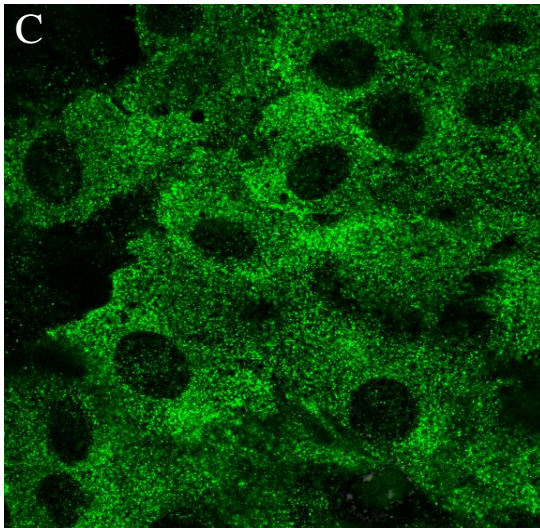

**Supplementary Figure 1:** Fluorescence images demonstrating the expression of Surfactant Protein A (A) and Surfactant Protein D (B) in C10 alveolar type II epithelial cells grown at the ALI for 24 hrs. A similar expression pattern was observed in submersed cultures, as demonstrated by the image in C, where Surfactant Protein D was stained. Rabbit antibody against mouse Surfactant Proteins A and D were used, following with a secondary goat anti-mouse Fab, tagged with Alexa Fluor 488.
