# Supplementary material
Source: PubMed Central journal article supplement (PMC3262851)
Supplement: supp_kfr251_KFR251_toxsci_11_0379_File003.pdf [file supp_kfr251_KFR251_toxsci_11_0379_File003.pdf]

**Supplementary Table 1**

| aggregates/20 $\mu\text{m}^2$ | Mass ( $\mu\text{g}/\text{cm}^2$ ) | Surface Area ( $\mu\text{m}^2/\text{cm}^2$ ) |
|-------------------------------|------------------------------------|----------------------------------------------|
| 1 - 21                        | 0.005 - 0.11                       | $2.15 \times 10^5 - 4.58 \times 10^6$        |
| 55 - 81                       | 0.28 - 0.41                        | $1.20 \times 10^7 - 1.77 \times 10^7$        |
| 90 - 120                      | 0.46 - 0.61                        | $1.96 \times 10^7 - 2.62 \times 10^7$        |
| 182 - 227                     | 0.93 - 1.15                        | $3.97 \times 10^7 - 4.95 \times 10^7$        |
| 263 - 283                     | 1.34 - 1.44                        | $5.73 \times 10^7 - 6.17 \times 10^7$        |
| 295 - 329                     | 1.50 - 1.67                        | $6.43 \times 10^7 - 7.17 \times 10^7$        |
| 433 - 460                     | 2.20 - 2.34                        | $9.44 \times 10^7 - 1.00 \times 10^8$        |
| 499 - 534                     | 2.54 - 2.72                        | $1.09 \times 10^8 - 1.16 \times 10^8$        |
| 768 - 809                     | 3.91 - 4.11                        | $1.67 \times 10^8 - 1.76 \times 10^8$        |
| 812 - 848                     | 4.13 - 4.31                        | $1.77 \times 10^8 - 1.85 \times 10^8$        |
| 1305 - 1420                   | 6.64 - 7.22                        | $2.84 \times 10^8 - 3.09 \times 10^8$        |

**Supplementary Table 1:** Dose metric conversion for the doses used in Figure 4A. The number of NPs expected in an aggregate (median diameter of 117 nm) was calculated according to Sterling et al. (2005), assuming a packing factor of 0.637 and a fractal dimension of 2.3. The cellular doses at the ALI, measured as number of aggregates/20  $\mu\text{m}^2$ , were converted to mass ( $\mu\text{g}/\text{cm}^2$ ) using density of  $5.6 \text{ g}/\text{cm}^3$  and to surface area ( $\mu\text{m}^2/\text{cm}^2$ ) using NP diameter of 25 nm.

Sterling, M. C., Bonner, J. S., Ernest, A. N. S., Page, C. A. and Autenrieth, R. L. (2005). Application of fractal flocculation and vertical transport model to aquatic sol-sediment systems. *Water Res* **39**, 1818-1830.
